# Supplementary material for: A new luminescent metal–organic framework based on dicarboxyl-substituted tetraphenylethene for efficient detection of nitro-containing explosives and antibiotics in aqueous media
Source: Royal Society of Chemistry journal article supplement (doi:10.1039/c7tc05535h), 2018-01-01
Supplement: c7tc05535h1.pdf [file c7tc05535h1.pdf]

## ***Electronic Supporting Information (ESI)***

### **1. Materials and Instrumentations**

All general reagents and solvents were purchased from Sinopharm Chemical Reagent Co., Ltd, Energy Chemical and Tokyo Chemical Industry. 1,2-bis(4-bromophenyl)-1,2-diphenylethene (2Br-TPE) was synthesized by following a previously reported method with some modifications. The synthetic details of 2Br-TPE were provided in Supporting Information. <sup>1</sup>H NMR and <sup>13</sup>C NMR spectra were recorded on a Varian Unity 600 MHz and 150 MHz spectrometer. Mass spectra were recorded on an Agilent 6210 TOF-MS spectrometer using electrospray ionization. The infrared spectra were recorded on a Shimadzu IR Prestige-21 FT-IR Spectrometer with pressed KBr pellets. UV-vis absorption spectra were recorded on PerkinElmer Lambda 750. X-ray crystal structures were obtained by using Bruker D8 CMOS detectors. The powder XRD patterns were recorded on a Bruker D8 ADVANCE X-ray diffractometer. Data were collected from 5°–50° 2θ, with the operating power set to 40 kV/40 mA. Thermogravimetric analyses (TGA) were performed under nitrogen in the temperature range 25–650 °C with a heating rate of 10 °C min<sup>-1</sup> on a GA-500 instrument. Solid fluorescence quantum yields were measured using a Hamamatsu absolute PL quantum yield spectrometer C11347 Quantaaurus-QY. Fluorescence lifetimes were determined with a Hamamatsu C11367-11 Quantaaurus-Tau time-resolved spectrometer. Theory calculations were performed using the density functional theory (DFT) with the B3LYP hybrid functional.

### **2. Synthesis**

**2Br-TPE.** Synthesis of the ligand 1,2-bis(4-bromophenyl)-1,2-diphenylethene (2Br-TPE) began with the reaction of solid (4-bromophenyl)(phenyl)methanone (5 g, 19.2 mmol) and Zn (2.48 g, 38.4 mmol) with TiCl<sub>4</sub> (20 mL, 20 mmol) in THF (50 mL) at -5 °C, and then heated to 75 °C for 6 h under nitrogen to produce 1,2-bis(4-bromophenyl)-1,2-diphenylethene (2Br-TPE), which was purified via silica gel column chromatography in ~75% yield.<sup>1,2</sup> <sup>1</sup>H NMR (600 MHz, CDCl<sub>3</sub>), δ (TMS, ppm): 7.19–7.13 (m, 4H), 7.07–7.02 (m, 6H), 6.93–6.89 (m, 4H), 6.84–6.77 (m, 4H). <sup>13</sup>C NMR (CDCl<sub>3</sub>, 150 MHz), δ (TMS, ppm): 141.84, 141.30, 139.25, 131.85, 130.14, 129.87, 126.99, 126.79, 125.96. ESI (FAB): *m/z* = 490.2 [M + H]<sup>+</sup>.

### 3. Additional Data

**Table S1.** Crystal data and structure refinements for complex 1.

| Compound                                              | complex 1                                                            |
|-------------------------------------------------------|----------------------------------------------------------------------|
| Formula                                               | C <sub>28</sub> H <sub>18</sub> O <sub>4.33</sub> Zn <sub>1.33</sub> |
| <i>M</i>                                              | 510.92                                                               |
| crystal system                                        | rhombohedral                                                         |
| space group                                           | <i>R</i>                                                             |
| <i>a</i> /Å                                           | 28.1564(14)                                                          |
| <i>b</i> /Å                                           | 28.1564(14)                                                          |
| <i>c</i> /Å                                           | 32.140(3)                                                            |
| <i>α</i> /deg                                         | 90.00                                                                |
| <i>β</i> /deg                                         | 90.00                                                                |
| <i>γ</i> /deg                                         | 120.00                                                               |
| <i>V</i> /Å <sup>3</sup>                              | 22067(3)                                                             |
| <i>Z</i>                                              | 18                                                                   |
| temperature/K                                         | 293(2)                                                               |
| <i>λ</i> (radiation wavelength)/Å                     | 0.71073                                                              |
| <i>D</i> (g/cm <sup>3</sup> )                         | 0.692                                                                |
| reflections collected                                 | 31202                                                                |
| <i>R</i> 1 <sup>a</sup> [ <i>I</i> > 2σ( <i>I</i> )]  | 0.0592                                                               |
| <i>wR</i> 2 <sup>b</sup> [ <i>I</i> > 2σ( <i>I</i> )] | 0.1330                                                               |
| goodness-of-fit                                       | 1.033                                                                |
| CCDC no.                                              | 1588480                                                              |

$$^a R1 = \sum |F_o - F_c| / \sum |F_o| \quad ^b wR2 = [\sum [w(F_o^2 - F_c^2)^2] / \sum w(F_o^2)]^{1/2}$$

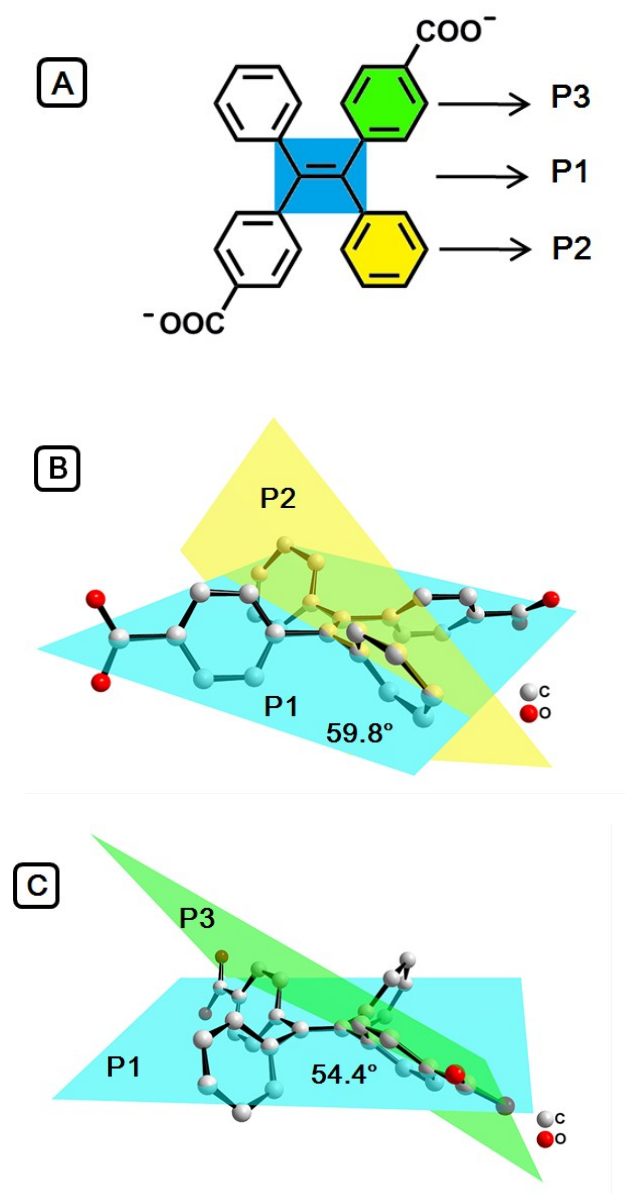

**Fig. S1** (A) The plane of the two C atoms forming central C=C double bond and four C atoms surround them is named P1. The planes of free phenyl ring adjacent to C=C bond are named P2. The planes of phenyl ring connected with carboxylic group are named P3. The average dihedral angles are labeled for (B) P1-P2 and (C) P1-P3 in complex 1.

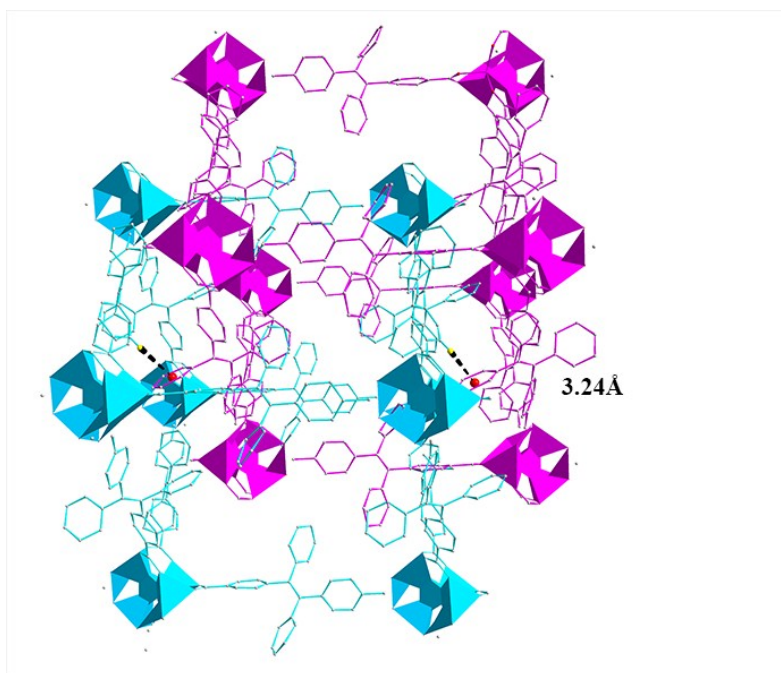

**Fig. S2** C–H... $\pi$  interactions of complex **1** (the black dotted lines are labeled for C–H... $\pi$  interactions).

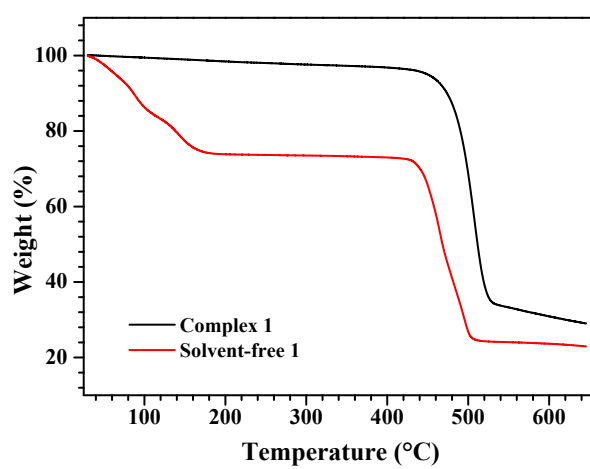

**Fig. S3** Thermogravimetric (TG) analyses of complex **1** and solvent-free **1**.

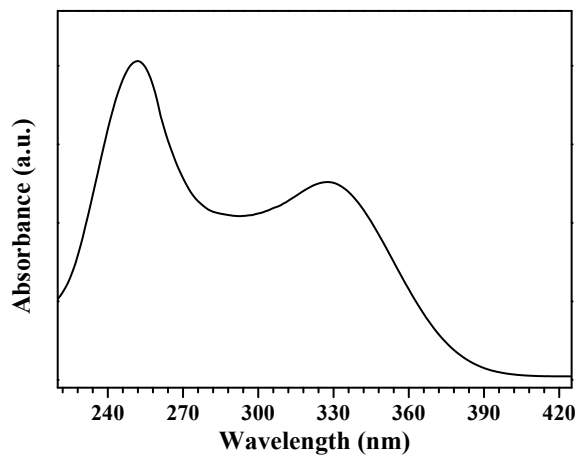

**Fig. S4** UV-vis absorption spectrum of H<sub>2</sub>BCTPE in THF solution.

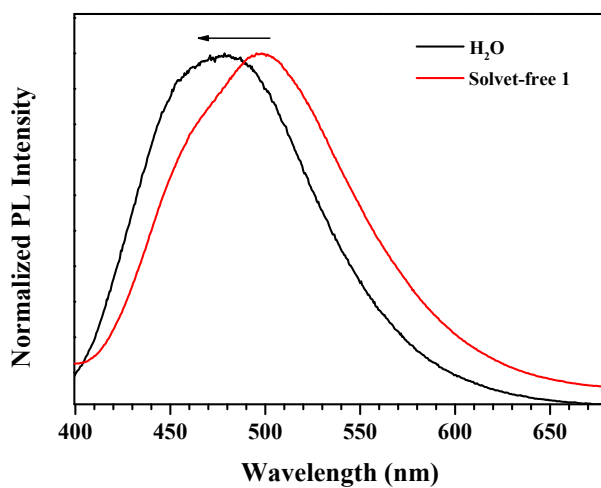

**Fig. S5** Emission spectra of solvent-free **1** dispersed in H<sub>2</sub>O ( $\lambda_{\text{ex}} = 365$  nm).

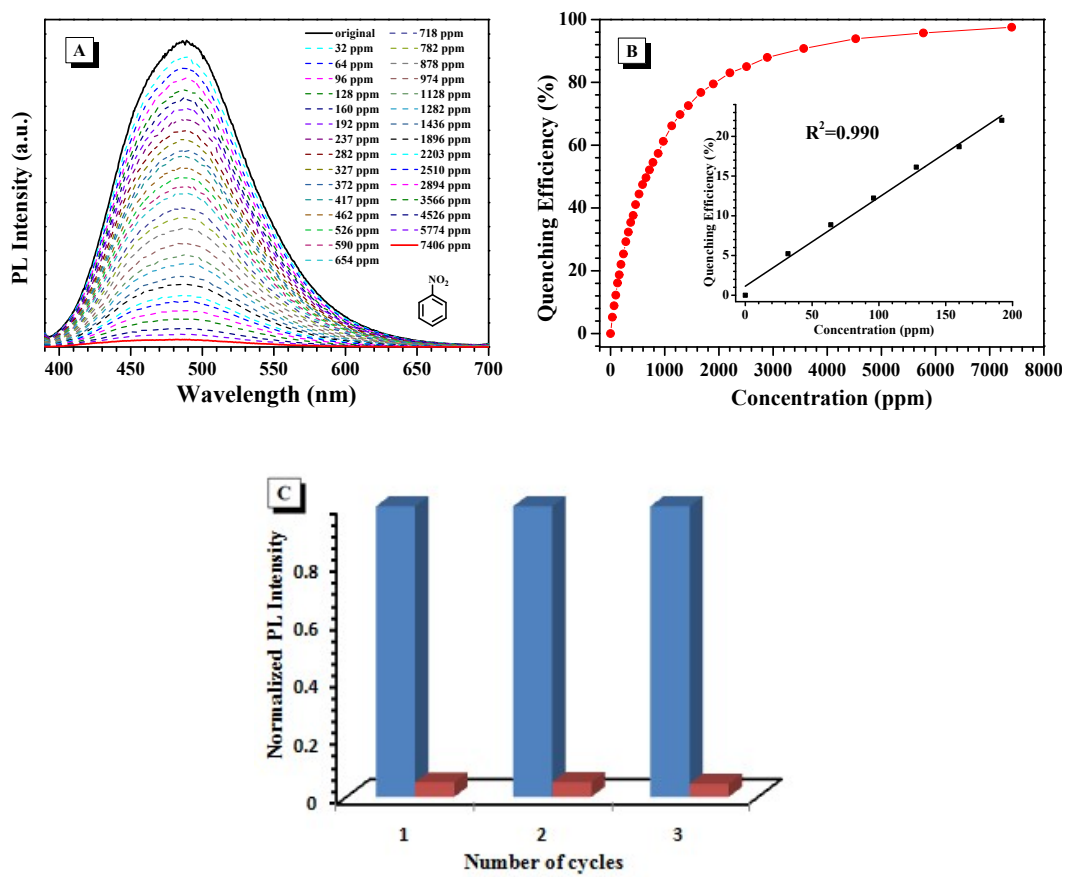

**Fig. S6** (A) Fluorescence titration of solvent-free **1** suspension with varied concentrations of nitrobenzene ( $\lambda_{\text{ex}}=365$  nm). (B) Correlation between the quenching efficiency and concentration of nitrobenzene. Inset: the linear relationship of fitting (0–200 ppm). (C) Reproducibility of the quenching ability of solvent-free **1** with nitrobenzene. (The blue bars represent the initial fluorescence intensity, and the red bars represent the intensity upon addition of 7000 ppm.)

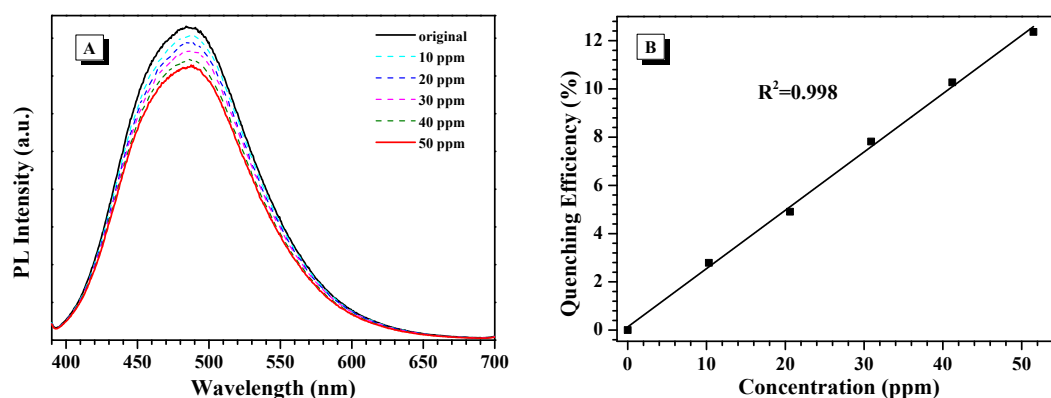

**Fig. S7** (A) Low-concentration fluorescence titration of nitrobenzene. (B) The fitting relationship for low-concentration fluorescence titration of solvent-free **1** with nitrobenzene.

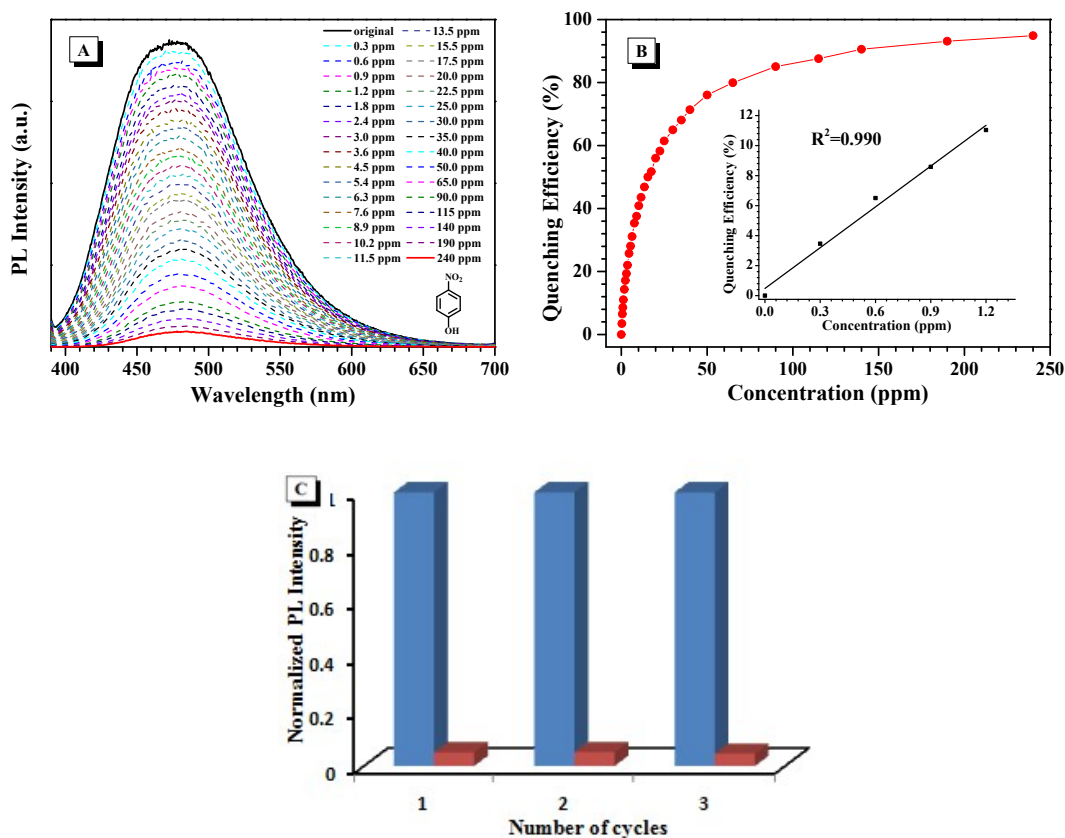

**Fig. S8** (A) Fluorescence titration of solvent-free **1** suspension with varied concentrations of 4-nitrophenol ( $\lambda_{\text{ex}}=365$  nm). (B) Correlation between the quenching efficiency and concentration of 4-nitrophenol. Inset: the linear relationship of fitting (0–1.2 ppm). (C) Reproducibility of the quenching ability of solvent-free **1** with 4-nitrophenol. (The blue bars represent the initial fluorescence intensity, and the red bars represent the intensity upon addition of 240 ppm.)

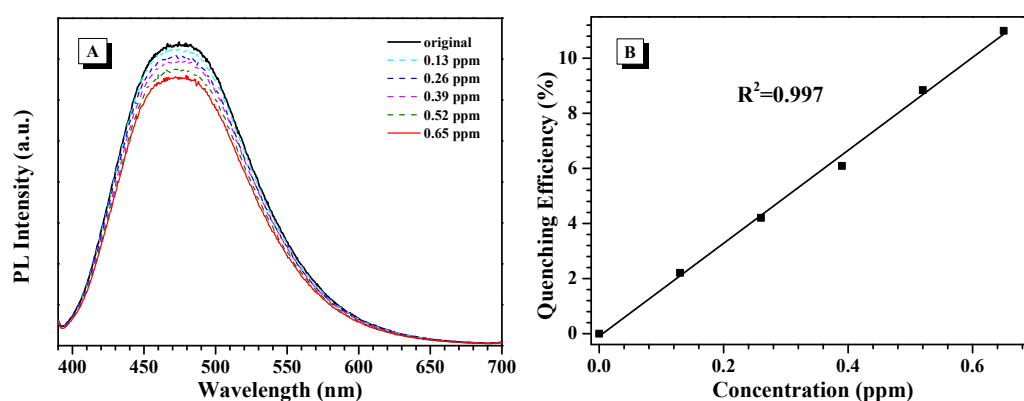

**Fig. S9** (A) Low-concentration fluorescence titration of 4-nitrophenol. (B) The fitting relationship for low-concentration fluorescence titration of solvent-free **1** with 4-nitrophenol.

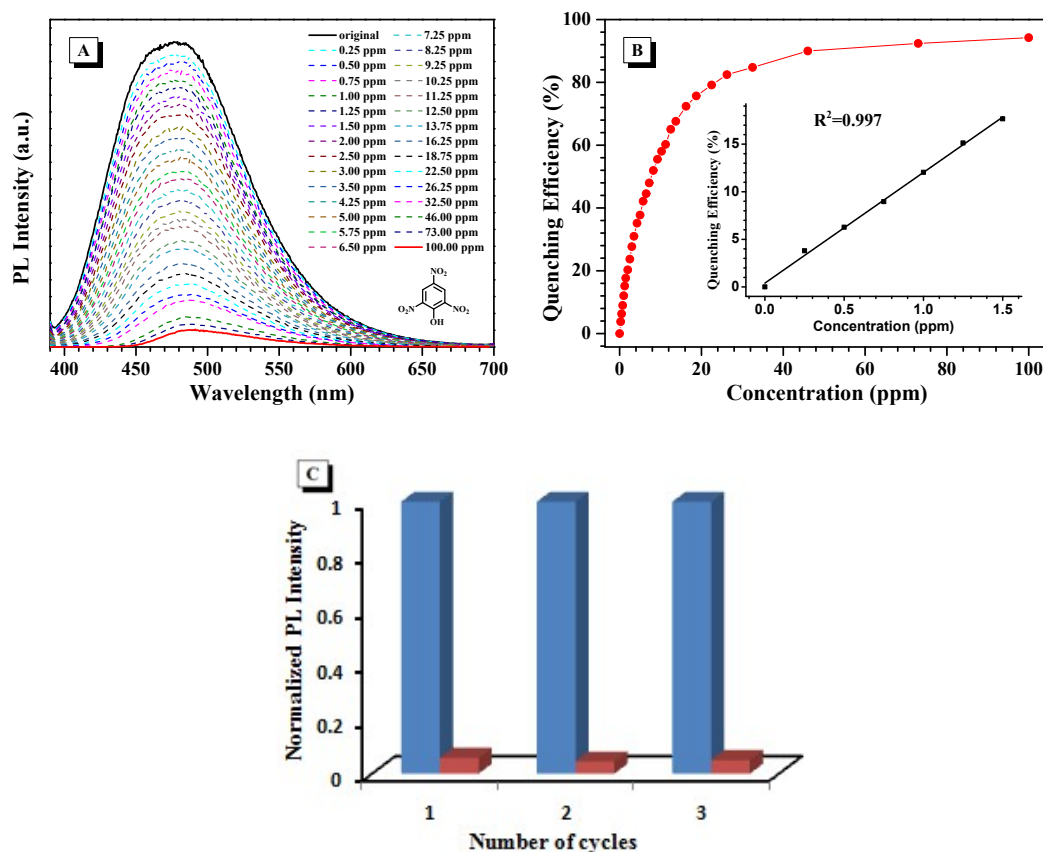

**Fig. S10** (A) Fluorescence titration of solvent-free **1** suspension with varied concentrations of 2,4,6-trinitrophenol ( $\lambda_{ex}=365$  nm). (B) Correlation between the quenching efficiency and concentration of picric acid. Inset: the linear relationship of fitting (0–1.5 ppm). (C) Reproducibility of the quenching ability of solvent-free **1** with 2,4,6-trinitrophenol. (The blue bars represent the initial fluorescence intensity, and the red bars represent the intensity upon addition of 100 ppm.)

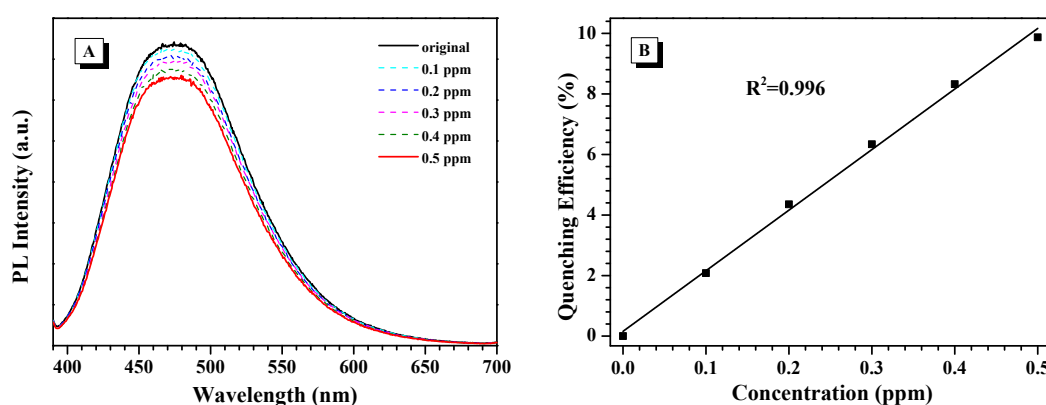

**Fig. S11** (A) Low-concentration fluorescence titration of 2,4,6-trinitrophenol. (B) The fitting relationship for low-concentration fluorescence titration of solvent-free **1** with 2,4,6-trinitrophenol.



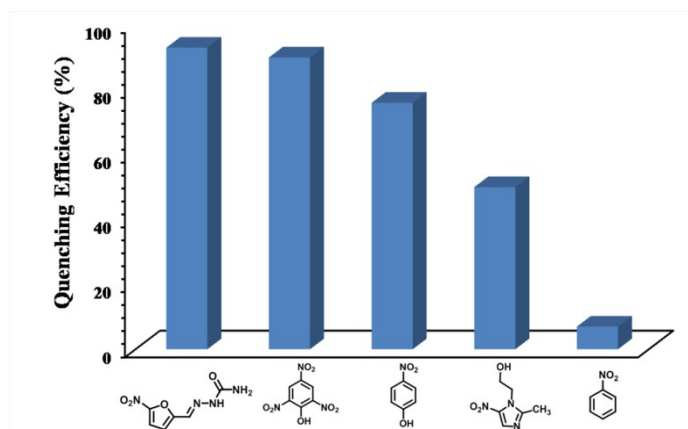

**Fig. S12** The quenching efficiencies of solvent-free **1** suspension by 50 ppm different analytes ( $\lambda_{\text{ex}}=365$  nm).

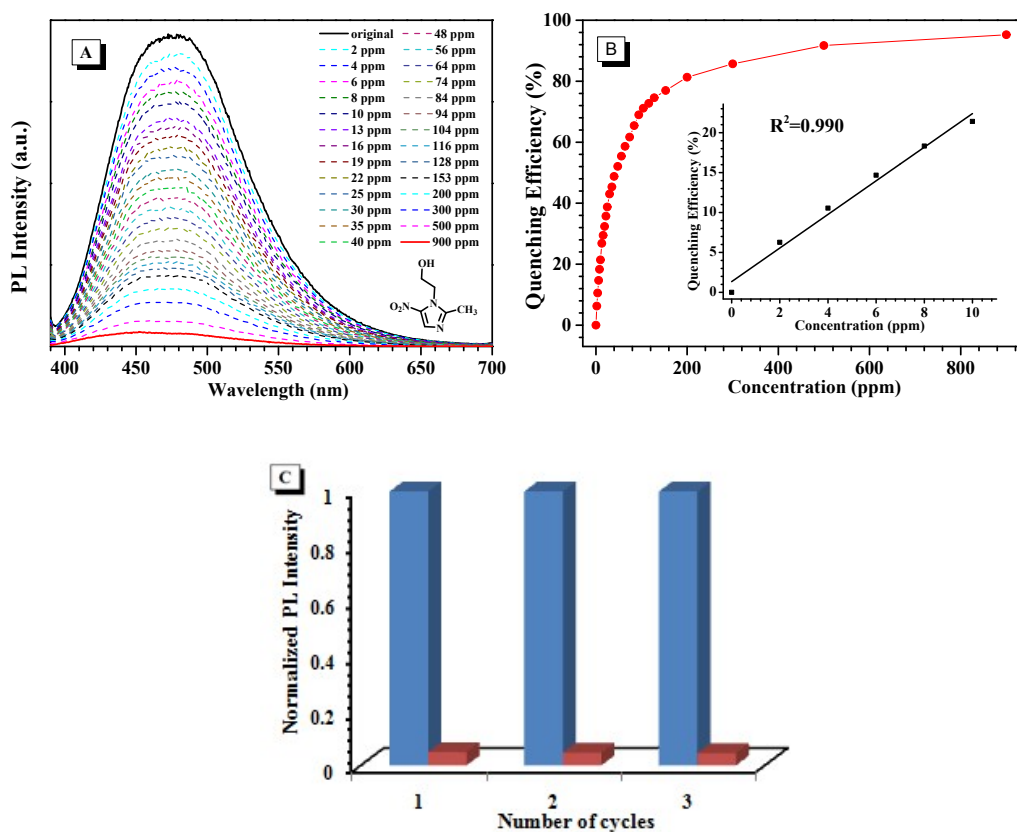

**Fig. S13** (A) Fluorescence titration of solvent-free **1** suspension with varied concentrations of metronidazole ( $\lambda_{\text{ex}}=365$  nm). (B) Correlation between the quenching efficiency and concentration of picric acid. Inset: the linear relationship of fitting (0–10 ppm). (C) Reproducibility of the quenching ability of solvent-free **1** with metronidazole. (The blue bars represent the initial fluorescence intensity, and the red bars represent the intensity upon addition of 900 ppm.)

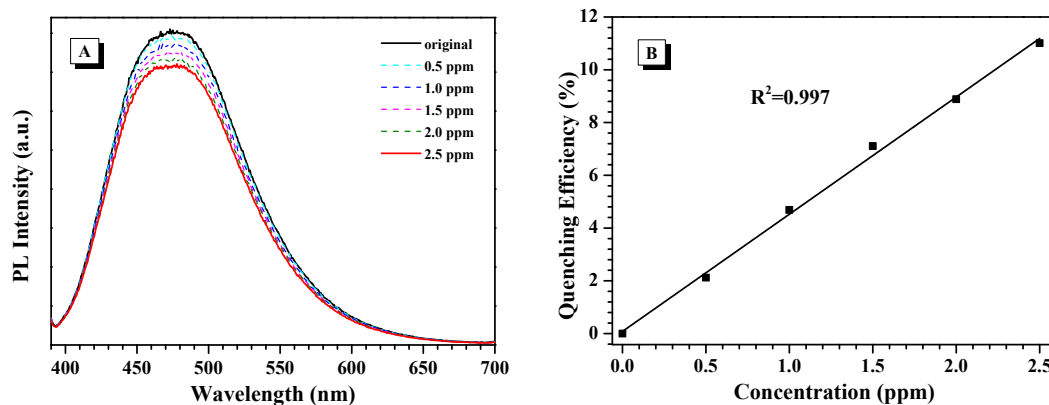

**Fig. S14** (A) Low-concentration fluorescence titration of metronidazole. (B) The fitting relationship for low-concentration fluorescence titration of solvent-free **1** with metronidazole.

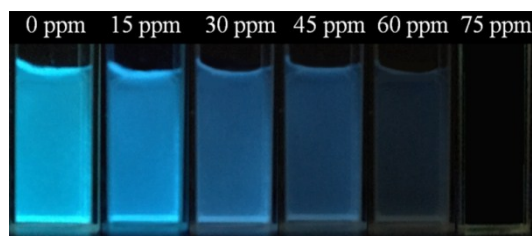

**Fig. S15** Fluorescence photos of solvent-free **1** suspension with gradually increased nitrofurazone.

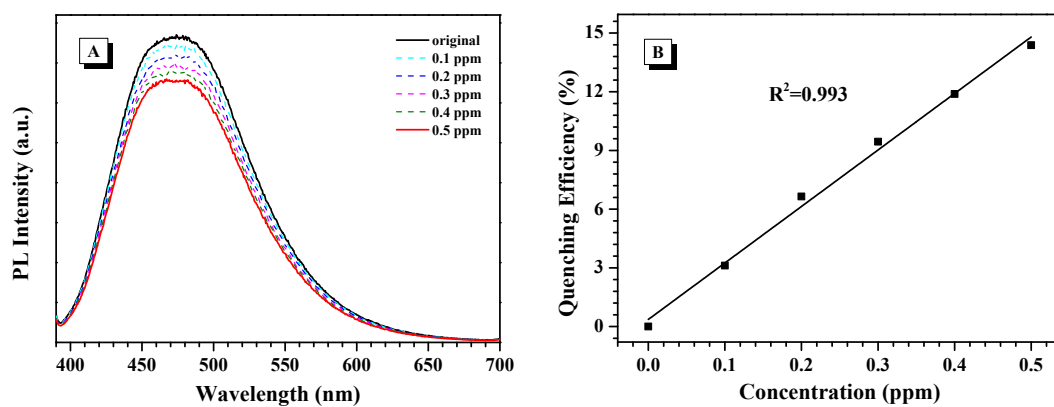

**Fig. S16** (A) Low-concentration fluorescence titration of nitrofurazone. (B) The fitting relationship for low-concentration fluorescence titration of solvent-free **1** with nitrofurazone.

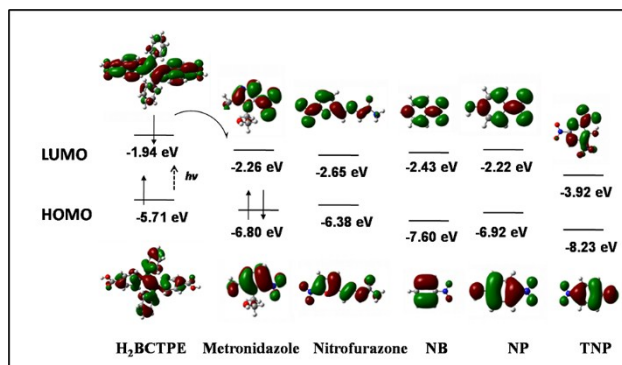

**Fig. S17** The HOMO and LUMO energy levels of H<sub>2</sub>BCTPE in complex **1**, metronidazole, nitrofurazone, NB, NP and TNP.

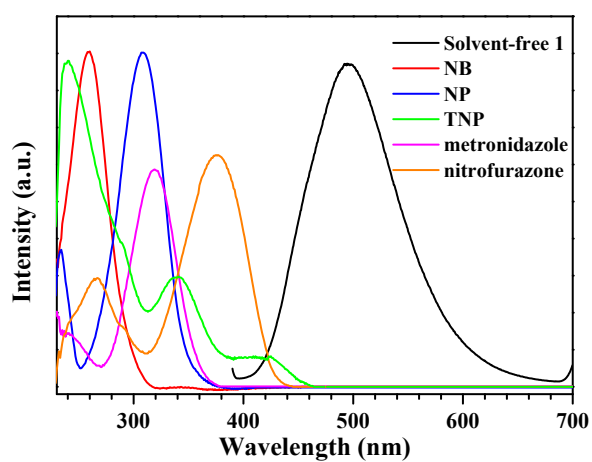

**Fig. S18** The absorption spectra of nitro-containing analytes and the emission spectrum of solvent-free **1**.

#### 4. Reference

1. Y. Ma, H. Ma, Z. Yang, J. Ma, Y. Su, W. Li and Z. Lei, *Langmuir*, 2015, **31**, 4916.
2. G. Lin, H. Peng, L. Chen, H. Nie, W. Luo, Y. Li, S. Chen, R. Hu, A. Qin, Z. Zhao and B. Z. Tang, *ACS Appl. Mater. Interfaces*, 2016, **8**, 16799.
